# Supplementary material
Source: PubMed Central journal article supplement (PMC2737681)

## Online data supplement

# Role of Protein Tyrosine Phosphatase 1B in VEGF Signaling and Cell-Cell Adhesions in Endothelial Cells

Yoshimasa Nakamura<sup>1,5</sup>, Nikolay Patrushev<sup>3</sup>, Hyoe Inomata<sup>1</sup>, Dolly Mehta<sup>1</sup>, Ha Won Kim<sup>2</sup>, Norifumi Urao<sup>1</sup>, Masooma Razvi<sup>1</sup>, Vidisha Kini<sup>1</sup>, Kalyankar Mahadev<sup>4</sup>, Barry J. Goldstein<sup>4</sup>, Ron Mckinney<sup>1</sup>, Tohru Fukai<sup>2</sup>, Masuko Ushio-Fukai<sup>1</sup>

<sup>1</sup> Department of Pharmacology, and <sup>2</sup>Departments of Medicine and Pharmacology, University of Illinois at Chicago, Chicago, IL  
<sup>3</sup>Emory University School of Medicine, Atlanta, GA  
<sup>4</sup> Division of Endocrinology, Diabetes and Metabolic Diseases Jefferson Medical College of Thomas Jefferson University, Philadelphia, PA  
<sup>5</sup> Department of Biofunctional Chemistry, Graduate School of Natural Science and Technology, Okayama University, Okayama, Japan

**Running title: Role of PTP1B in VEGF signaling**

Address correspondence to:

Masuko Ushio-Fukai, Ph.D  
Dept. of Pharmacology  
Center for Lung and Vascular Biology  
University of Illinois at Chicago  
835 S. Wolcott, M/C868,  
E403 MSB  
Chicago, IL 60612  
Phone: 312-996-7665  
Fax: 312-996-1225  
Email: [mfukai@uic.edu](mailto:mfukai@uic.edu)

## Materials and Methods

*Materials-* Antibodies to VEGFR2, phosphotyrosine (pY99), VE-cadherin, and phospho-PLC $\gamma$  (pY783), actin and GAPDH were from Santa Cruz. Antibodies to phospho-VEGFR2 (pY1175), phospho-extracellular signal-regulated kinase 1/2 (ERK1/2), phospho-p38 mitogen-activated protein kinase (MAPK), ERK1/2, and p38 MAPK were from Cell Signaling. Anti-PTP1B monoclonal antibody and rabbit polyclonal antibody were from Calbiochem and Upstate, respectively. Human recombinant VEGF165 was from R&D Systems and BRB Preclinical Repository. Oligofectamine, and Opti-MEMI Reduced-Serum Medium were from Invitrogen Corp. CellTiter 96<sup>®</sup> solution cell proliferation assay was obtained from Promega. Other materials including anti-vinculin antibody were purchased from Sigma.

*Cell Culture-* Human umbilical vein ECs (HUVECs) were purchased from VEC Technologies, Inc. (Rensselaer, NY) and were grown in endothelial basal medium2 (EBM2, Clonetics) containing 10% fetal bovine serum (FBS) as described <sup>1</sup>. Experiments were performed using cells between passages 3 and 6.

*Immunoprecipitation and Immunoblotting-* Growth-arrested HUVECs were stimulated with VEGF (10 ng/ml) and cells were lysed in lysis buffer, pH 7.4 (in mM) 50 HEPES, 5 EDTA, 50 NaCl, 1% Triton X-100, protease inhibitors (10  $\mu$ g/ml aprotinin, 1 mmol/L phenylmethylsulfonyl fluoride, 10  $\mu$ g/ml leupeptin) and phosphatase inhibitors ((in mmol/L) 50 sodium fluoride, 1 sodium orthovanadate, 10 sodium pyrophosphate). Cell lysates were used for immunoprecipitation and immunoblotting as described previously <sup>2</sup>.

*Transient Transfection of CHO cells-* CHO cells were transiently transfected with pcDNA3-myc-VEGFR2cyto (entire intracellular domain of human KDR, residues 790-1356) and pMT2-GST-PTP1B-WT or PTP1B-D181A or PTP1B-C215S which were kindly provided by Dr. Nicholas Tonks <sup>3</sup> using the Polyfect according to manufacturer's instruction (Qiagene).

*Adenovirus Transduction -* HUVECs were incubated with 10 multiples of infection (MOI) of either adenovirus expressing wild-type PTP1B (Ad.PTP1B-WT) or PTP1B-C/S (catalytically inactive C215S mutant; Ad.PTP1B-C/S) or Ad.LacZ (control) in 10% FBS

containing culture medium for 24 hr, followed by incubation in 0.5% FBS without virus for 12 hr before experiments, as we described previously<sup>4</sup>.

*siRNA Transfection*- RNA oligonucleotides were obtained from Sigma. The sequences of specific siRNA against PTP1B is; 5'-AAATCAACGGAAGAAGGGTCT-3'. The scrambled siRNA control is 5'-GAGATGACACGACUGAGATAA-3'. We performed a Blast search and confirmed that the PTP1B and scrambled siRNA sequences have no overlap with other proteins. HUVECs were grown to 60 % confluence in 100 mm dishes and transfected with 30 nM siRNA using Oligofectamine (Invitrogen), as described previously<sup>5</sup>. Cells were used for experiments at 48 hr after transfection.

*PTP1B Activity Assay*- HUVEC cells or mice hindlimb muscles were snap-frozen in liquid N<sub>2</sub>, and disrupted by scraping into ice-cold, deoxygenated homogenization buffer (150 mM NaCl, 5 mM EDTA, 5 mM EGTA, in 50 mM Hepes, pH 7.5, containing a protease inhibitor mixture (Sigma), 1% (v/v) Triton X-100, and 0.5% (v/v) NP-40, followed by brief sonication. The whole cell lysate was cleared by centrifugation at 15,000 g for 20 min. Specific PTP1B activity was measured by the hydrolysis of p-nitrophenyl phosphate (pNPP; Sigma) in PTP1B immunoprecipitates. Briefly, PTP1B immunoprecipitates from 500  $\mu$ g of cell lysates were incubated in a final volume of 100  $\mu$ l at 37 °C for 30 min in reaction buffer containing 10 mM pNPP and 2 mM EDTA in 20 mM MES at pH 6.0. The reaction was stopped by the addition of 200  $\mu$ l of 5 M NaOH, and the absorption was determined at 410 nm<sup>6</sup>.

*In Vivo Receptor Dephosphorylation Assays*- Growth-arrested HUVECs were stimulated with VEGF for 5min, and cell lysates were immunoprecipitated with rabbit anti-VEGFR2 antibody and immobilized on protein A/G agarose for 1.5 hr. Beads were washed and incubated in the presence of recombinant active PTP1B protein (Biomol, 50-200ng) at 30 °C for 10 min in 50  $\mu$ l of buffer (20 mM Tris-HCl, pH 7.5, 0.1 M NaCl, 12 mM MgCl, 1 mM dithiothreitol, 10  $\mu$ M ATP). The reaction was stopped by adding 2x sample buffer and samples were immunoblotted with anti-phosphotyrosine or VEGFR2 antibodies.

*Cell Proliferation Assay-* HUVECs ( $10^5$  cells) were seeded in 6-well plates in EBM containing 10% FBS overnight, and incubated in EBM containing 0.5% FBS for 24 hours and then incubated with or without stimulants in EBM containing 0.2% FBS for 48 hours. After culturing, 20  $\mu$ l of an CellTiter 96<sup>®</sup> solution was added to each well, and the absorbance was measured at 490 nm according to the manufacturer's instructions after incubation at 37°C for 2-3 h. In some experiments, after trypsinization, the cell number was determined by counting with a hemocytometer <sup>1</sup>.

*Modified Boyden Chamber Migration Assay-* Migration assays using a Modified Boyden Chamber method were conducted in 24-well transwell chambers as described previously <sup>1</sup>.

*Confocal Immunofluorescence Microscopy-* HUVECs growing on 0.1% gelatin-coated glass coverslips were stimulated with VEGF or vehicle alone, and fixed with 4% paraformaldehyde in PBS, and permeabilized in 0.05% Triton X-100/PBS for 5 min. After blocking, cells were incubated with rabbit anti-VE-cadherin antibody for 1 hr, incubated in FITC-conjugated goat anti-rabbit IgG for 1 hr. Images were taken using the confocal laser scanning imaging system Zeiss LSM 510. In some experiments, HUVECs were transiently transfected with plasmid encoding GFP-PTP1B-D/A or GFP only which were kindly provided by Dr. Carlos Arregui <sup>7</sup> using Amaxia Nucleofector System according to manufacturer's instruction, as reported previously <sup>8</sup>. After transfection, cells were stimulated with VEGF, fixed, permeabilized, and were incubated with anti-VE-cadherin antibody, followed by Rhodamine Red X-conjugated goat anti-rabbit IgG.

*Transendothelial Electrical Resistance Measurement-* The time course of endothelial cell retraction in real time, as a measure of increased endothelial permeability, was recorded as described previously <sup>8</sup>.

*Mouse Ischemic Hindlimb Model-* Study protocols were approved by the Animal Care and Use Committee of University of Illinois at Chicago. Female C57BL/6J mice (8-9 weeks of age) were obtained from The Jackson Laboratory. The right superficial femoral artery was ligated proximally and distally with 5-0 silk ligatures, and excised. To measure hind limb blood flow we used a laser Doppler blood flow (LDBF) analyzer (Lisca AB,

Sweden) as described previously<sup>9</sup>. At 0, 1, 3 7 days after ischemia, thigh adductor muscle in ischemic hindlimbs were used for immunoblotting and immunohistochemistry as described previously<sup>4, 9, 10</sup>.

*Statistical Analysis*- Results are expressed as mean  $\pm$  S.E. Statistical significance was assessed by Student's paired two-tailed t-test or analysis of variance on untransformed data, followed by comparison of group averages by contrast analysis, using the Super ANOVA statistical program (Abacus Concepts, Berkeley, CA). A p value of <0.05 was considered to be statistically significant.

### References

1. Ushio-Fukai M, Tang Y, Fukai T, Dikalov S, Ma Y, Fujimoto M, Quinn MT, Pagano PJ, Johnson C, Alexander RW. Novel role of gp91phox-containing NAD(P)H oxidase in vascular endothelial growth factor-induced signaling and angiogenesis. *Circ Res.* 2002;91:1160-1167.
2. Ushio-Fukai M, Alexander RW, Akers M, Griendling KK. p38MAP kinase is a critical component of the redox-sensitive signaling pathways by angiotensin II: role in vascular smooth muscle cell hypertrophy. *J Biol Chem.* 1998;273:15022-15029.
3. Meng TC, Buckley DA, Galic S, Tiganis T, Tonks NK. Regulation of insulin signaling through reversible oxidation of the protein tyrosine phosphatases TC45 and PTP1B. *J Biol Chem.* 2004;279:37716-37725.
4. Ikeda S, Ushio-Fukai M, Zuo L, Tojo T, Dikalov S, Patrushev NA, Alexander RW. Novel role of ARF6 in vascular endothelial growth factor-induced signaling and angiogenesis. *Circ Res.* 2005;96:467-475.
5. Yamaoka-Tojo M, Ushio-Fukai M, Hilenski L, Dikalov SI, Chen YE, Tojo T, Fukai T, Fujimoto M, Patrushev NA, Wang N, Kontos CD, Bloom GS, Alexander RW. IQGAP1, a novel vascular endothelial growth factor receptor binding protein, is involved in reactive oxygen species-dependent endothelial migration and proliferation. *Circ Res.* 2004;95:276-283.
6. Goldstein BJ, Bittner-Kowalczyk A, White MF, Harbeck M. Tyrosine dephosphorylation and deactivation of insulin receptor substrate-1 by protein-tyrosine phosphatase 1B. Possible facilitation by the formation of a ternary complex with the Grb2 adaptor protein. *J Biol Chem.* 2000;275:4283-4289.
7. Hernandez MV, Sala MG, Balsamo J, Lilien J, Arregui CO. ER-bound PTP1B is targeted to newly forming cell-matrix adhesions. *J Cell Sci.* 2006;119:1233-1243.
8. Singh I, Knezevic N, Ahmmed GU, Kini V, Malik AB, Mehta D. Galphaq-TRPC6-mediated Ca<sup>2+</sup> entry induces RhoA activation and resultant endothelial cell shape change in response to thrombin. *J Biol Chem.* 2007;282:7833-7843.

9. Tojo T, Ushio-Fukai M, Yamaoka-Tojo M, Ikeda S, Patrushev NA, Alexander RW. Role of gp91phox (Nox2)-containing NAD(P)H oxidase in angiogenesis in response to hindlimb ischemia. *Circulation*. 2005;111:2347-2355.
10. Yamaoka-Tojo M, Tojo T, Kim HW, Hilenski L, Patrushev NA, Zhang L, Fukai T, Ushio-Fukai M. IQGAP1 mediates VE-cadherin-based cell-cell contacts and VEGF signaling at adherence junctions linked to angiogenesis. *Arterioscler Thromb Vasc Biol*. 2006;26:1991-1997.

**Figure legends for Supplemental Figures****Supplemental Figure I. PTP1B overexpression inhibits while PTP1B knockdown enhances VEGF-induced phosphorylation of VEGFR2-Tyr1175, PLC $\gamma$ 1 and ERK1/2.**

HUVECs infected with Ad.LacZ (control), Ad.PTP1B-WT, or Ad.PTP1B-C/S (A) or transiently transfected with scrambled (control) or PTP1B siRNAs (B) were stimulated with VEGF (20 ng/ml) for 5 min. Lysates were immunoblotted with anti-phospho-VEGFR2 (pY1175) or phospho-PLC $\gamma$ 1 (pY783) or phospho-ERK1/2 antibodies. Bottom panels show averaged data, expressed as fold change of phosphorylation over basal (means  $\pm$  S.E., n=3). \*P < 0.05 for VEGF-induced changes in cells infected with Ad.PTP or transfected with PTP1B siRNA vs control.

**Supplemental Figure II. PTP1B overexpression or knockdown has no effects on VEGF-induced cell migration.**

HUVECs infected with Ad.LacZ (control), Ad.PTP1B-WT, or Ad.PTP1B-C/S (A) or transiently transfected with scrambled or PTP1B siRNAs (B) were used for measurement of cell migration with the modified Boyden chamber method. Cells were stimulated with 50 ng/ml VEGF for 6 hours. Bar graph represents averaged data, expressed as cell number counted per 10 fields (X200) and fold change in cell number over that in unstimulated LacZ-infected (A) or scrambled siRNA-transfected (B) cells (control).

**Supplemental Figure III. PTP1B negatively regulates tyrosine phosphorylation of VE-cadherin through binding to VE-cadherin.**

HUVECs infected with Ad.LacZ (control), Ad.PTP1B-WT, or Ad.PTP1B-C/S (A) or transiently transfected with scrambled or IQGAP1 siRNAs (B) were stimulated with VEGF (20 ng/ml). Lysates were immunoprecipitated with anti-pTyr antibody, and then immunoblotted with VE-cadherin antibody, and averaged data for tyrosine phosphorylation of VE-cadherin, as expressed by mean $\pm$ SE for 3 independent experiments are shown. C, HUVECs infected with Ad.LacZ (control), Ad.PTP1B-WT, or Ad.PTP1B-C/S were stimulated with VEGF (20 ng/ml) for 5 min, and lysates were immunoprecipitated with anti-PTP1B antibody, and then immunoblotted with VE-cadherin antibody. The blots are representative of 3 separate



experiments.

**Supplemental Figure IV. Increase of PTP1B expression at lectin-positive ECs and skeletal myocyte in mouse ischemic hindlimb model of angiogenesis.** Hindlimb ischemia was induced by the right femoral artery ligation as described in Materials and Methods. Immunostaining of ischemic adductor skeletal muscle with anti-PTP1B antibody (green) or lectin which stains ECs of capillaries (red) at 0, 3 and 7 days after ischemia was visualized with a confocal fluorescence microscope. NC indicates staining without primary antibody (negative control).

# Supplemental Figure I

**A**

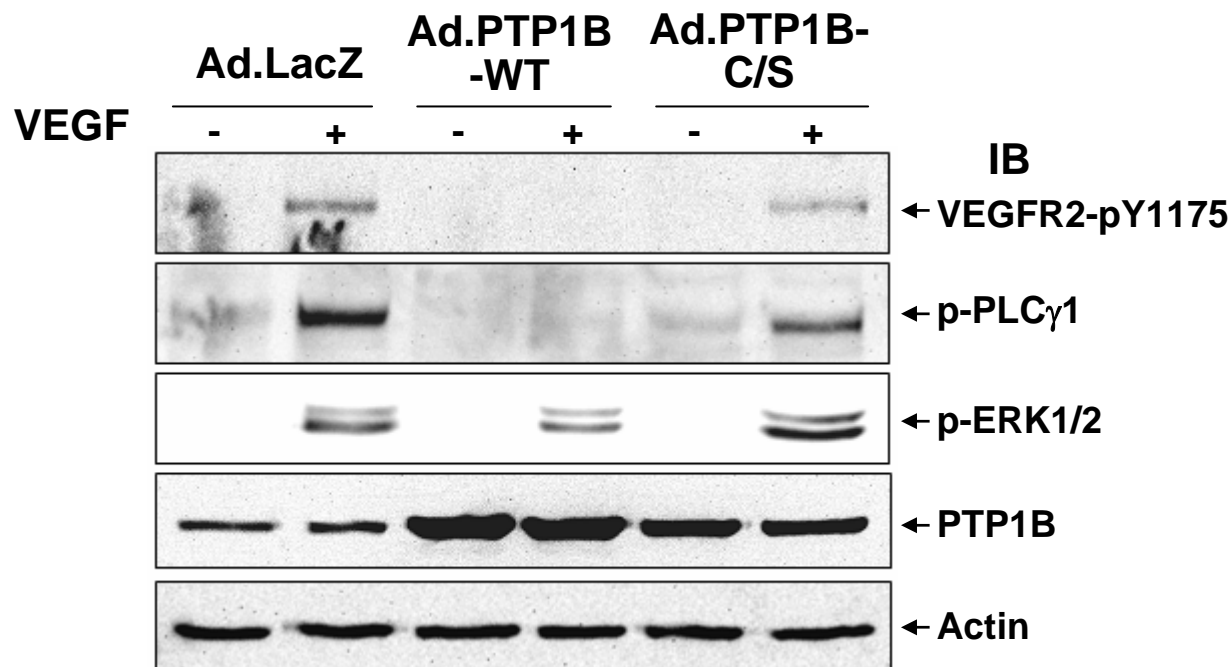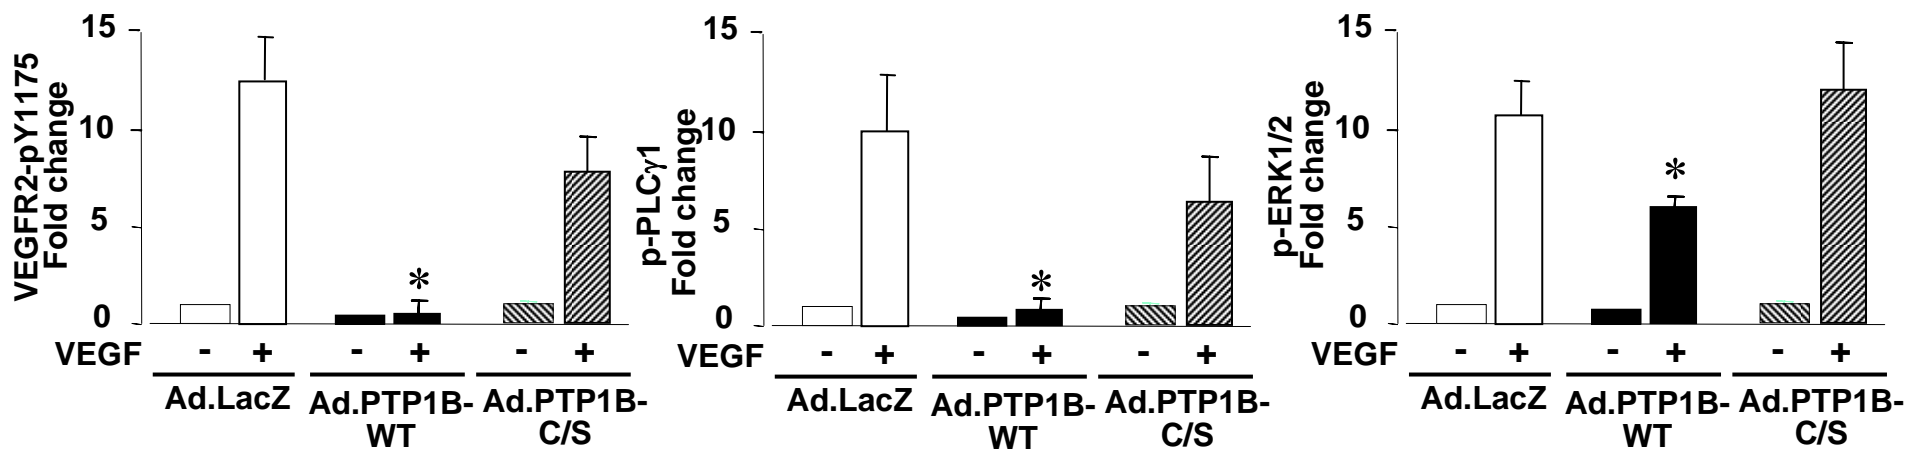

# Supplemental Figure I

## B

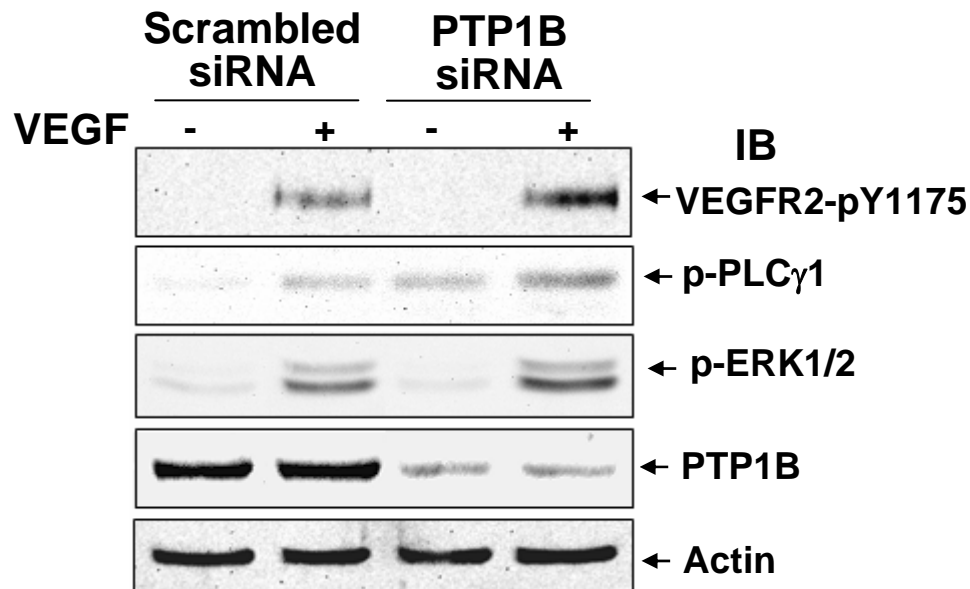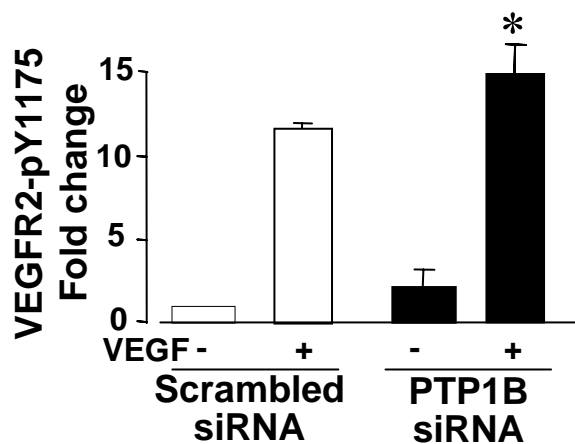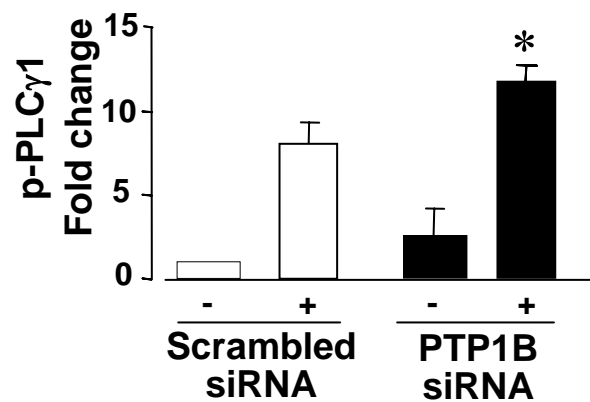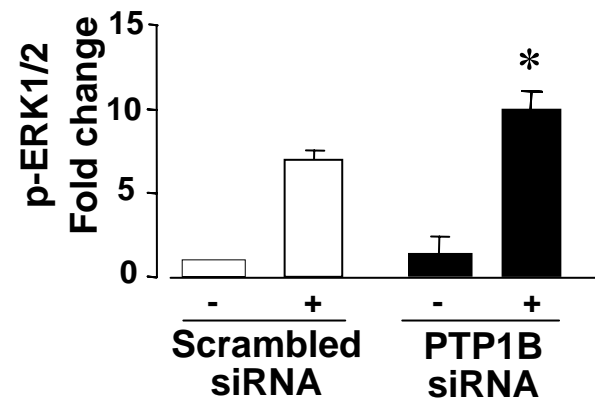

# Supplemental Figure II

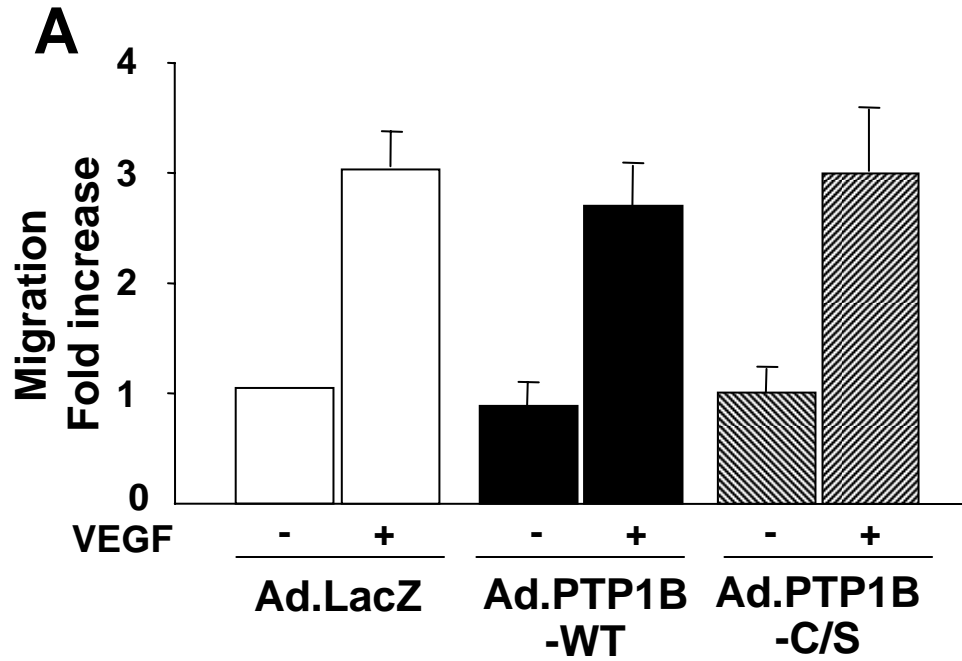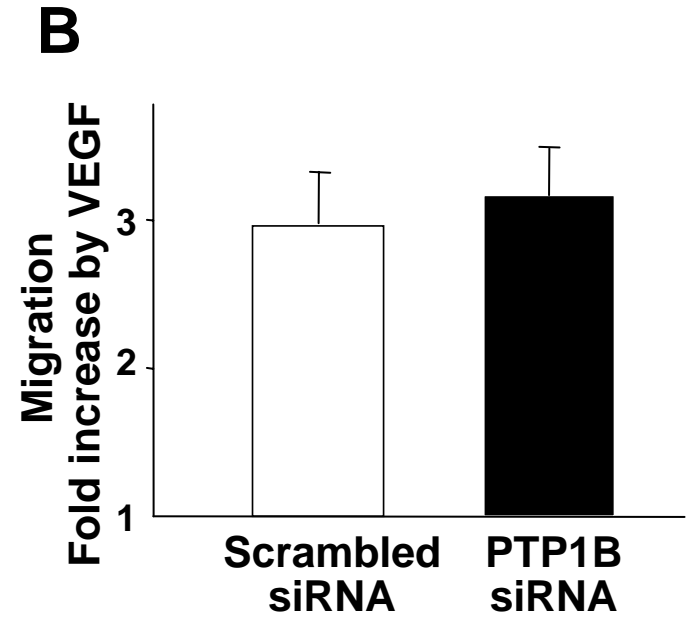

# Supplemental Figure III

**A**

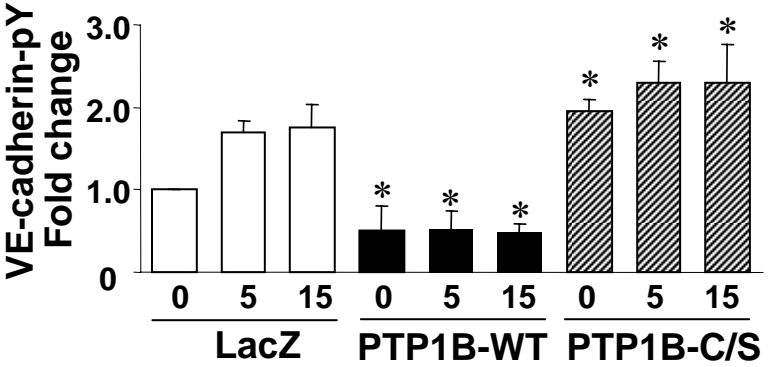

**B**

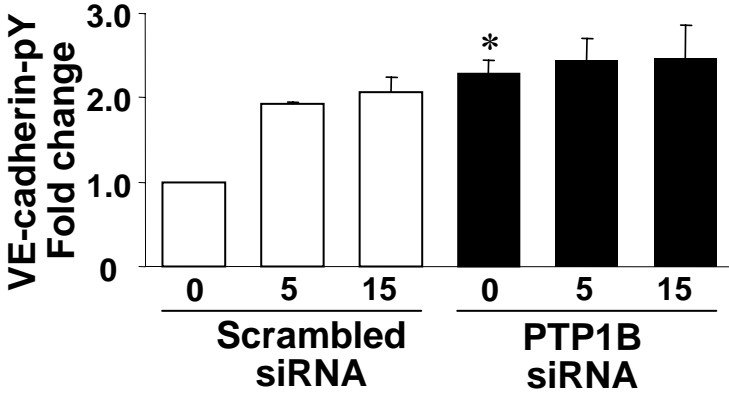

**C**

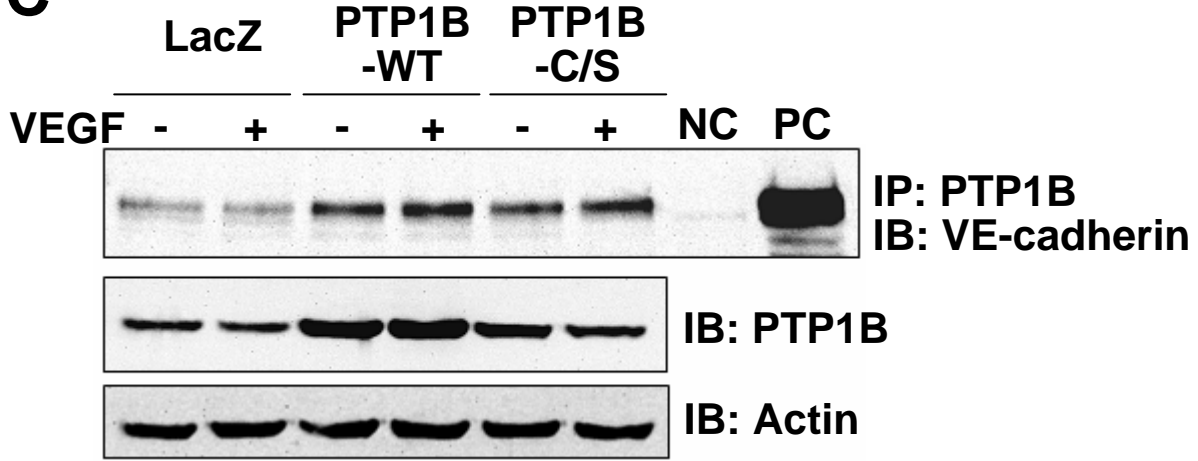

# Supplemental Figure IV

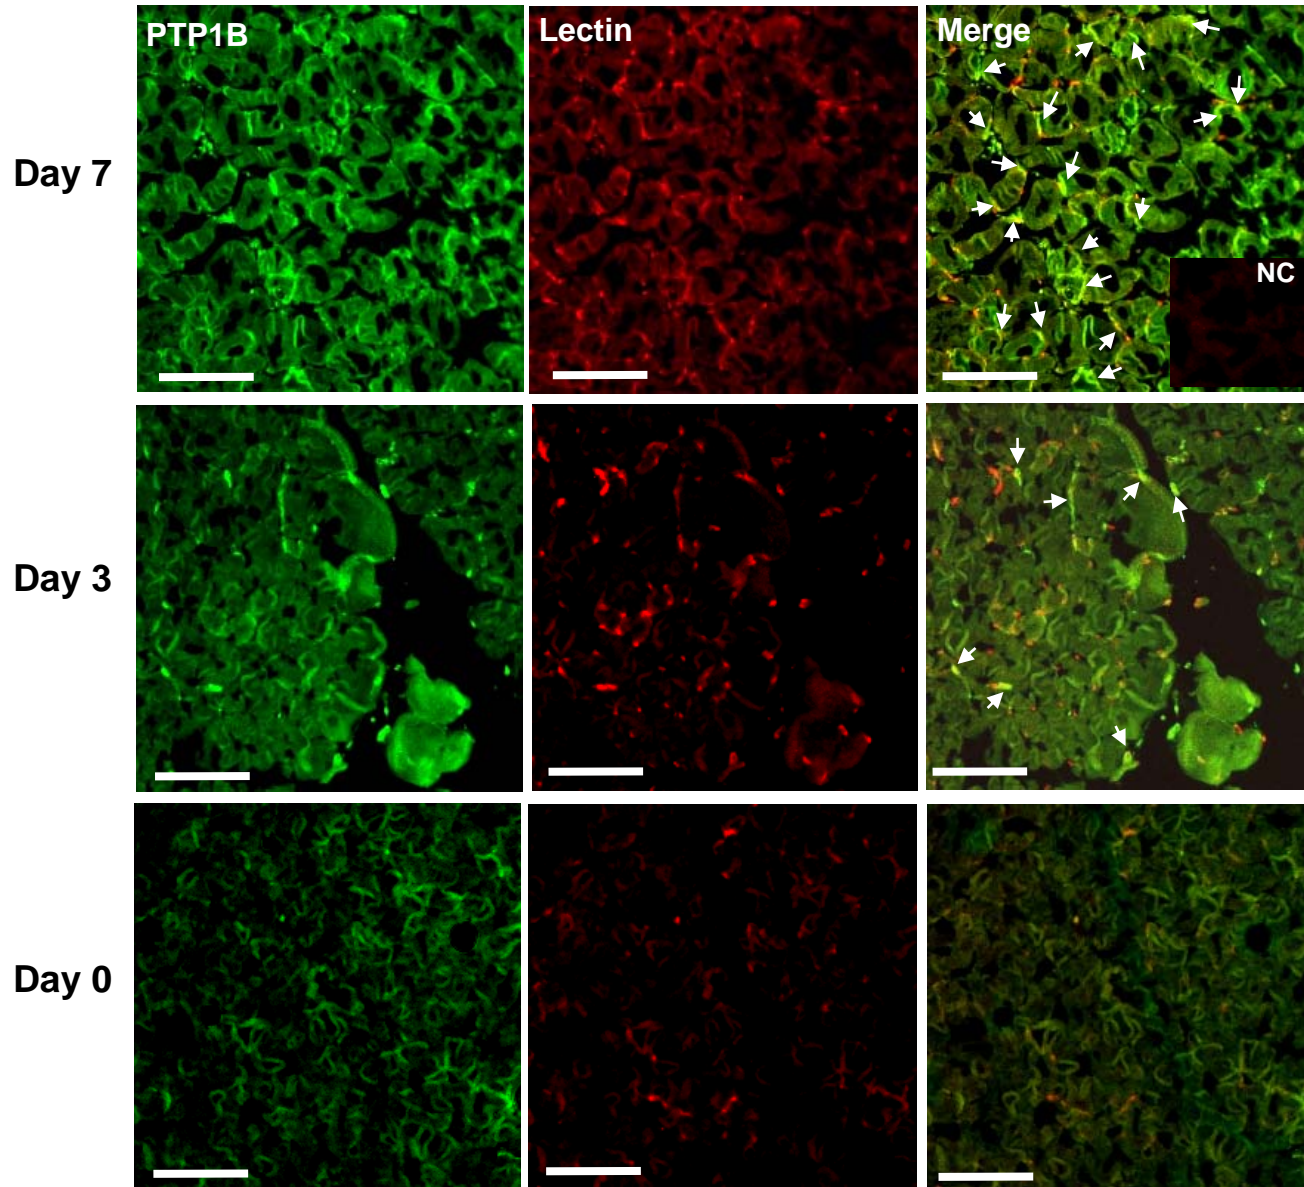

Supplement: NIHMS127015-supplement-1.pdf [file NIHMS127015-supplement-1.pdf]
